# Supplementary material for: PEI-Mediated Transient Transfection of High Five Cells at Bioreactor Scale for HIV-1 VLP Production
Source: MDPI journal article supplement (doi:10.3390/nano10081580), 2020-08-12
Supplement: s1 [file s1]

# PEI-Mediated Transient Transfection of High Five Cells at Bioreactor Scale for HIV-1 VLP Production

Eduard Puente-Massaguer, Florian Strobl, Reingard Grabherr, Gerald Striedner, Martí Lecina and Francesc Gòdia

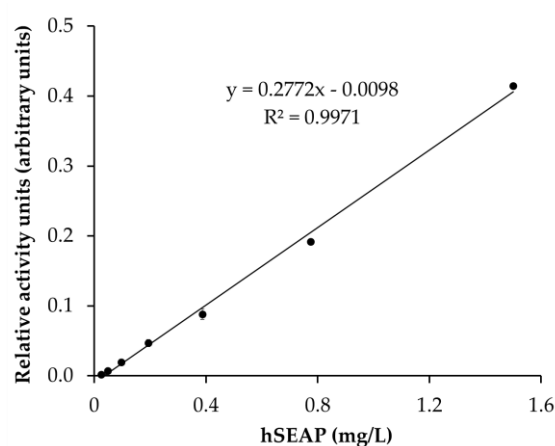

**Figure S1.** Linear relation between relative activity units (arbitrary units) and hSEAP concentrations (mg/L).

**Table S1.** Uptake and production rates of the main metabolites in parental High Five cells cultured at bioreactor scale. Cells were seeded at  $1 \times 10^6$  cell/mL and cultured in 0.5 L of bioreactor volume. Rates are expressed in nmol/( $10^6$  cell·h).

| Metabolite    | Time (h) |         |         |
|---------------|----------|---------|---------|
|               | 0 – 24   | 24 – 48 | 48 – 72 |
| Glucose       | -118.5   | -95.3   | -55.4   |
| Lactate       | -17.8    | -8.5    | 0.7     |
| Aspartic acid | 14.1     | -17.3   | -7.1    |
| Glutamic acid | -37.0    | -23.1   | -7.6    |
| Asparagine    | -117.7   | -19.7   | -       |
| Glutamine     | -23.7    | -30.0   | -19.8   |
| Alanine       | 161.6    | 86.9    | 41.3    |
